# Supplementary material
Source: HighWire-hosted journal article supplement (https://www.jrheum.org/highwire/filestream/34124/field_highwire_adjunct_files/0/170438DataSuppl.pdf)
Supplement: 170438DataSuppl.pdf [file 170438DataSuppl.pdf]

**Supplementary Table 1.** Baseline demographics and characteristics in all responders and non-responders.

|                                                          | <b>MTX-treated patients (n=75)</b> |                              | <b>Anti-TNF-treated patients (n=88)</b> |                           |
|----------------------------------------------------------|------------------------------------|------------------------------|-----------------------------------------|---------------------------|
|                                                          | Responders<br>(n=57)               | Non-<br>responders<br>(n=18) | Responders<br>(n=66)                    | Non-<br>responders (n=22) |
| <b>Baseline demographic</b>                              |                                    |                              |                                         |                           |
| Age at JIA onset in years, median (IQR)                  | 6.1 (2.6-11.0)                     | 4.5 (2.4-10.5)               | 10.0 (4.2-12.3)                         | 9.4 (3.1-13.7)            |
| Disease duration at therapy start in years, median (IQR) | 1.3 (0.4-4.7)                      | 2.2 (0.7-3.8)                | 2.4 (1.1-4.9)                           | 2.3 (0.8-7.7)             |
| Female, n (%)                                            | 39 (68)                            | 13 (72)                      | 48 (73)                                 | 18 (82)                   |
| Anti-TNF therapy,                                        |                                    |                              |                                         |                           |
| Etanercept, n (% of all Etanercept)                      | n/a                                | n/a                          | 61 (75)                                 | 20 (25)                   |
| Adalimumab, n (% of all Adalimumab)                      | n/a                                | n/a                          | 5 (71)                                  | 2 (29)                    |
| <b>JIA Category at start, n (%)</b>                      |                                    |                              |                                         |                           |
| Oligoarticular persistent                                | 7 (12)                             | 6 (35)                       | 2 (3)                                   | 3 (14)                    |
| Oligoarticular extended                                  | 15 (26)                            | 2 (12)                       | 16 (24)                                 | 8 (36)                    |
| Polyarticular RF-                                        | 23 (40)                            | 6 (35)                       | 26 (39)                                 | 7 (32)                    |
| Polyarticular RF+                                        | 5 (9)                              | 1 (6)                        | 11 (17)                                 | 2 (9)                     |
| Enthesitis-related arthritis                             | 5 (9)                              | 1 (6)                        | 3 (5)                                   | 1 (5)                     |
| Psoriatic                                                | 2 (4)                              | 1 (6)                        | 8 (12)                                  | 1 (5)                     |
| <b>Clinical variables at baseline</b>                    |                                    |                              |                                         |                           |
| Active joints, n                                         | 5 (2-10)                           | 4 (2-5)*                     | 11 (5-18)                               | 8 (2-16)                  |
| CHAQ score (0-3)                                         | 1 (0.31-1.75)                      | 0.81 (0.25-2.06)             | 1.49 (0.75-2.13)                        | 1.35 (0.63-1.96)          |
| ESR (mm/h)                                               | 25 (10-69)                         | 19 (8-35)                    | 16 (9-30)                               | 12 (7-18)                 |
| JADAS-10 (0-40), median (IQR)                            | 14 (8-23)                          | 10 (7-14)                    | 20 (14-23)                              | 17 (11-22)                |
| S100A12 at baseline, median (IQR), ng/ml                 | 240 (125-615)                      | 150 (87-233)*                | 308 (150-624)                           | 151 (83-201)**            |

**Abbreviations:** **MTX** methotrexate, **anti-TNF** anti-tumour-necrosis factor therapy, **JIA** juvenile idiopathic arthritis, **CHAQ** Childhood Assessment Questionnaire, **ESR** erythrocyte sedimentation rate, **JADAS-10** Juvenile Arthritis Disease Activity

\*/\*\* indicates significance between responders and non responder within MTX treated patients, or within anti-TNF treated patients as follows: \*p< 0.05, \*\*p< 0.005 (Mann Whitney U).

**Supplementary Table 2.** S100A12 concentrations measured by commercial *CircuLex* ELISA.

|                                                                                                                                                                                                                                                                                                                                                                                                                                                                                                                                                                                                                                                                          |
|--------------------------------------------------------------------------------------------------------------------------------------------------------------------------------------------------------------------------------------------------------------------------------------------------------------------------------------------------------------------------------------------------------------------------------------------------------------------------------------------------------------------------------------------------------------------------------------------------------------------------------------------------------------------------|
| <b><i>Performance of in-house assay versus CircuLex assay</i></b>                                                                                                                                                                                                                                                                                                                                                                                                                                                                                                                                                                                                        |
| MTX: S100A12 concentrations measured by the in house ELISA assay significantly correlate with <i>CircuLex</i> measured concentrations (Spearman's rho: 0.85, p<0.001).                                                                                                                                                                                                                                                                                                                                                                                                                                                                                                   |
| Anti-TNF: S100A12 concentrations measured by the in house ELISA assay significantly correlate with <i>CircuLex</i> measured concentrations (Spearman's rho: 0.687, p<0.001).                                                                                                                                                                                                                                                                                                                                                                                                                                                                                             |
| <b><i>S100A12 levels at baseline and response to treatment</i></b>                                                                                                                                                                                                                                                                                                                                                                                                                                                                                                                                                                                                       |
| Baseline S100A12 serum levels were higher in responders (median 720 (IQR 320-1765) compared to non-responders (median 417, IQR 243-818, p=0.039) for MTX treated patients (Figure 1A).                                                                                                                                                                                                                                                                                                                                                                                                                                                                                   |
| For anti-TNF treated patients, baseline S100A12 serum levels were also higher in responders (median 407, IQR 212-710) compared to non-responders (median 239, IQR 150-436, p=0.020).                                                                                                                                                                                                                                                                                                                                                                                                                                                                                     |
| In a univariate logistic regression this resulted in an OR of 1.06 for MTX therapy (95%CI 1.004-1.115, and an OR of 1.14 (95% CI: 1.01-1.28) for achieving at least an ACRpedi 50 response per 50 units of S100A12 ( <i>CircuLex</i> )(ng/ml) for anti-TNF therapy.                                                                                                                                                                                                                                                                                                                                                                                                      |
| <b><i>Prediction of response corrected for other variables</i></b>                                                                                                                                                                                                                                                                                                                                                                                                                                                                                                                                                                                                       |
| Baseline S100A12 serum levels were significantly associated with change in JADAS-10 in a univariate linear regression analysis ( $\beta$ = -0.149, 95% CI -0.298 to -0.0007, p=0.050 per 50 units change in S100A12 for anti-TNF treated patients. For MTX this was: $\beta$ = -0.159 (95% CI -0.264 - -0.053) In the corrected multivariable analysis the corrected $\beta$ was -0.089 per 50 units increase in ng/ml, 95% CI -0.212 to 0.034 for anti-TNF therapy. The change in explained variance was 1.4% (not significant). Multivariable analysis: corrected beta for MTX: -0.102 (95% CI: -0.139 - -0.039), the change in explained variance was 5.3% (p=0.002). |
| Multivariate models constructed with known predictors of response as shown in the method were performed to test their association of with JADAS-10 score for each treatment group. Without S100A12, the variables in the model explained 70 % (equal to that as measured by in-house ELISA) of the variance in change in JADAS-10 at follow-up for MTX-treated patients, and 50 % (also the same as with the in-house ELISA) for the anti-TNF group. Including S100A12 as a variable increased the models prediction by 5.3% (more than the 2% with the in-house ELISA) for MTX and 1.4% (vs 5% with the in-house ELISA) for anti-TNF treated groups.                    |

***Use of S100A12 as a prognostic marker for response to treatment***

The *CircuLex* ELISA was less accurate compared to the in-house ELISA for predicting response to anti-TNF treatment and MTX, shown in Supplementary Table 3.

**Supplementary Table 3.** Sensitivity, specificity and likelihood ratios for the determined cut-off of S100A12 predicting response to MTX anti-TNF treatment, *CircuLex* ELISA.

|                               | <i>CircuLex</i> ELISA: MTX | <i>CircuLex</i> ELISA: anti-TNF |
|-------------------------------|----------------------------|---------------------------------|
| Cut-off level S100A12 (ng/ml) | 846                        | 508                             |
| Sensitivity                   | 45.6                       | 39.4                            |
| Specificity                   | 83.3                       | 86.4                            |
| Positive likelihood ratio     | 2.7                        | 2.9                             |
| Negative likelihood ratio     | 0.7                        | 0.7                             |
| Youden index                  | 0.289                      | 0.258                           |
| AUC                           | 0.662 (0.532-0.791)        | 0.675 (0.550-0.800)             |

AUC= area under the curve.
